# Supplementary material
Source: Springer Nature journal article supplement (https://www.springermedizin.de/resource/supplementary/12885_2011_3039_MOESM3_ESM.pdf/9462802)
Supplement: MOESM3 [file 9462802]

|              | Representative spectrum? | Acceptable reference standard? | Acceptable delay between tests? | Partial verification avoided? | Differential verification avoided? | Incorporation avoided? | Reference standard results blinded? | Index test results blinded? | Relevant clinical information? | Uninterpretable results reported? | Withdrawals explained? |
|--------------|--------------------------|--------------------------------|---------------------------------|-------------------------------|------------------------------------|------------------------|-------------------------------------|-----------------------------|--------------------------------|-----------------------------------|------------------------|
| Hu 2009      | -                        | +                              | ?                               | +                             | -                                  | -                      | -                                   | +                           | +                              | +                                 | +                      |
| Mao 2010     | -                        | +                              | +                               | +                             | -                                  | -                      | -                                   | +                           | +                              | +                                 | +                      |
| Marrero 2005 | -                        | +                              | +                               | +                             | -                                  | +                      | -                                   | +                           | +                              | +                                 | +                      |
| Morota 2011  | -                        | ?                              | +                               | +                             | ?                                  | ?                      | -                                   | +                           | ?                              | +                                 | +                      |
| Ozkan 2010   | -                        | +                              | ?                               | +                             | -                                  | +                      | -                                   | +                           | +                              | +                                 | +                      |
| Shi2011      | -                        | ?                              | ?                               | +                             | ?                                  | ?                      | -                                   | +                           | +                              | ?                                 | -                      |
| Tian 2010    | -                        | +                              | ?                               | +                             | -                                  | +                      | -                                   | +                           | +                              | +                                 | +                      |
| Wang 2009    | -                        | +                              | +                               | +                             | -                                  | +                      | -                                   | +                           | +                              | +                                 | +                      |
